# Supplementary material
Source: HighWire-hosted journal article supplement (https://bmjopen.bmj.com/content/6/7/e010302)
Supplement: inline-supplementary-material-1 [file inline-supplementary-material-1.pdf]

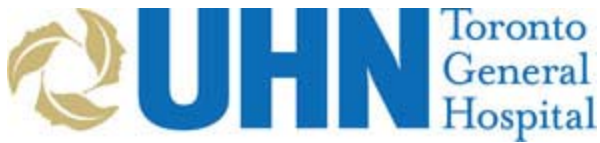

# Tropical Disease Unit

## RAPID ASSESSMENT

### Fever in the Returned Traveller

### Patient Information Sheet

**PLEASE COME TO THE TROPICAL DISEASE UNIT [TGH] 13<sup>TH</sup> FLOOR NORTH ROOM 1350 WITH A COPY OF YOUR REFERRAL FROM THE EMERGENCY ROOM AT 9 AM.**

**\*\* PLEASE BRING HOSPITAL BLUE CARD AND OHIP (HEALTH) CARD TO THE CLINIC\*\***

**PLEASE NOTE THAT PATIENTS WILL BE ACCOMMODATED WITHIN OUR REGULARLY SCHEDULED CLINICS AND MAY NEED TO WAIT FOR AN AVAILABLE PHYSICIAN.**

Dear Patient,

You have been referred to the “Rapid Assessment of Fever in the Returned Traveler” Clinic, which is located on the 13<sup>th</sup> Floor of the North Wing of Toronto General Hospital. Please present to the clinic at 9 am on the day of your discharge from the Emergency Room.

Fever in the Returned Traveler is a medical emergency, so prompt care is required. Please notify the clinic at 416-340-3675 if you are unable to attend your appointment.

Reasons to return to the Emergency Room after discharge but before your “Rapid Assessment” Clinic appointment include:

- Worsening fever
- Confusion and/or neck stiffness and/or severe headache
- Inability to keep liquids or solids down without vomiting
- New or worsening symptoms

The “Rapid Assessment of Fever in the Returned Traveler” Clinic operates in addition to regularly scheduled tropical medicine clinics, and it is therefore expected that Rapid Assessment patients will have to wait for an available physician. Please expect to have additional blood tests and other investigations such as x-rays on the day of your Rapid Assessment appointment.

Thank you for allowing us to contribute to your care.
